# Supplementary material for: Insights into the Genetic History of French Cattle from Dense SNP Data on 47 Worldwide Breeds
Source: PLoS One. 2010 Sep 30;5(9):e13038. doi: 10.1371/journal.pone.0013038 (PMC2948016; doi:10.1371/journal.pone.0013038)
Supplement: Table S1 — Sample Description. The land of origin, country of sampling (N = North, S = South, SE = South East, SW = South West, NE = North East, NW = North West and M = Middle) and type of the populations (EUT = European Taurines, SYN = Synthetic breeds, NAT = North African Taurines, WAT = West African Taurines, WAH = West African Hybrids, WAZ = West African Zebus, EAZ = East African Taurines and ZEB = Zebus from Indian origin) are indicated, together with the number of individuals sampled. For each breed, marker polymorphism is summarized through average heterozygosity computed across the 44,706 SNPs considered in this study and the proportion of SNPs with a MAF above 0.05. (0.03 MB XLS) [file pone.0013038.s007.xls]

## Sheet: Feuil1
Code	Breed Name	Type	Country of sampling	Land of Origin	#ind (#male/#female)	Average Heterozygosity (%SNPs with a MAF>0.05)	Origin of the Data
ABO	Abondance	EUT	France (SE)	France (SE)	22 (0/22)	0.2889 (76.4)	this study
ANG	Angus	EUT	USA, New Zealand	Scotland	24 (21/3)	0.3019 (80.3)	[14]
AUB	Aubrac	EUT	France (S)	France (S)	22 (15/7)	0.2958 (78.4)	this study
BLO	Blonde d'Aquitaine	EUT	France (SW)	France (SW)	29 (29/0)	0.2621 (75.3)	this study
BPN	Bretonne Black Pied	EUT	France (NW)	France (NW)	18 (2/16)	0.3020 (82.5)	this study
BRU	French Brown Swiss	EUT	France	Switzerland	18 (10/8)	0.2780 (76.7)	this study
BSW	Brown Swiss	EUT	USA	Switzerland	22 (19/3)	0.2643 (70.4)	[14]
CHA	Charolais	EUT	France (M)	France (M)	20 (5/15)	0.3056 (80.0)	this study
CHL	Charolais	EUT	United Kingdom	France (M)	26 (20/6)	0.3118 (83.8)	[14]
GAS	Gascon	EUT	France (SW)	France (SW)	22 (17/5)	0.2963 (78.5)	this study
GNS	Guernsey	EUT	USA, United Kingdom	Channel Islands	21 (1/20)	0.2715 (71.6)	[14]
HFD	Hereford	EUT	USA, New Zealand	England	21 (19/2)	0.3102 (80.6)	[14]
HO2	Holstein (US)	EUT	USA, New Zealand	Northern Europe	31 (28/3)	0.3070 (80.6)	[14]
HOL	Holstein (FR)	EUT	France	Northern Europe	30 (30/0)	0.3068 (80.5)	[16]
JE2	Jersey (US)	EUT	USA, New Zealand	Channel Islands	28 (25/3)	0.2544 (70.6)	[14]
JER	Jersey (FR)	EUT	France (NW)	Channel Islands	21 (1/20)	0.2694 (71.4)	this study
LMS	Limousin	EUT	USA, France	France (MW)	25 (23/2)	0.3043 (82.0)	[14]
MAN	Maine-Anjou (Rouge des Près)	EUT	France (NW)	France (NW)	23 (4/19)	0.2953 (79.4)	this study
MAR	Maraichine (Parthenaise)	EUT	France (NW)	France (NW)	19 (9/10)	0.3049 (83.8)	this study
MON	Montbeliarde	EUT	France	France (E)	30 (30/0)	0.2821 (74.6)	[16]
NOR	Normande	EUT	France	France (NW)	30 (30/0)	0.2905 (76.9)	[16]
NRC	Norwegian Red Cattle	EUT	Norway	Norway	21 (16/5)	0.3060 (80.1)	[14]
PMT	Piedmontese	EUT	Italy (N)	Italy (N)	24 (16/8)	0.3101 (83.0)	[14]
PRP	French Red Pied Lowland	EUT	France (NW)	France (NW)	22 (0/22)	0.3156 (83.0)	this study
RGU	Red Angus	EUT	USA, Canada	Scotland	15 (14/1)	0.2951 (79.1)	[14]
RMG	Romagnola	EUT	Italy	Italy	24 (21/3)	0.2827 (76.2)	[14]
SAL	Salers	EUT	France (S)	France (S)	22 (20/2)	0.2826 (75.4)	this study
TAR	Tarine	EUT	France (SE)	France (SE)	18 (0/18)	0.2873 (78.9)	this study
VOS	Vosgienne	EUT	France (NE)	France (NE)	20 (3/17)	0.2966 (78.2)	this study
BMA	Beef Master	SYN	USA	USA	24 (23/1)	0.3133 (83.8)	[14]
SGT	Santa Gertrudis	SYN	USA	USA	24 (21/3)	0.3044 (81.9)	[14]
OUL	Oulmès Zaer	NAT	Morocco	Morocco	27 (4/23)	0.2722 (74.7)	[15]
BAO	Baoule	WAT	Burkina Faso	Burkina Faso	29 (8/21)	0.2090 (58.9)	[15]
LAG	Lagune	WAT	Benin	Benin	30 (11/19)	0.1828 (48.9)	[15]
ND1	N'Dama	WAT	Burkina Faso (SE)	West Africa	14 (2/12)	0.2231 (61.8)	[15]
ND2	N'Dama	WAT	Burkina Faso (SW)	West Africa	17 (10/7)	0.2072 (57.4)	[15]
ND3	N'Dama	WAT	Guinea	West Africa	25 (5/20)	0.2064 (57.1)	[14]
SOM	Somba	WAT	Togo	Togo	30 (11/19)	0.2240 (60.5)	[15]
BOR	Borgou	WAH	Benin	Benin	30 (12/18)	0.2590 (68.8)	[15]
KUR	Kuri	WAH	Chad	Chad	30 (3/27)	0.2566 (68.4)	[15]
ZBO	Zebu Bororo	WAZ	Chad	West-Africa	23 (2/21)	0.2402 (66.8)	[15]
ZFU	Zebu Fulani	WAZ	Benin	West-Africa	30 (4/26)	0.2373 (64.8)	[15]
SHK	Sheko	EAT	Ethiopia	East Africa	20 (6/14)	0.2432 (64.8)	[14]
ZMA	Zebu from Madagascar	ZEB	Madagascar	Madagascar	30 (0/30)	0.1945 (52.9)	[15]
BRM	Brahman	ZEB	USA, Australia	USA (India)	25 (14/11)	0.1918 (58.6)	[14]
GIR	Gir	ZEB	Brazil	India	24 (22/2)	0.1583 (46.7)	[14]
NEL	Nelore	ZEB	Brazil	India	21 (12/9)	0.1556 (44.1)	[14]
OBB	Bison bison		USA	USA	4	0.0110 (3.1)	[14]
