# Supplementary material for: Insights into the Genetic History of French Cattle from Dense SNP Data on 47 Worldwide Breeds
Source: PLoS One. 2010 Sep 30;5(9):e13038. doi: 10.1371/journal.pone.0013038 (PMC2948016; doi:10.1371/journal.pone.0013038)
Supplement: Table S4 — FST for each pair of populations. (0.05 MB XLS) [file pone.0013038.s010.xls]

## Sheet: TableS4
	ABO	ANG	AUB	BAO	BLO	BMA	BOR	BPN	BRM	BRU	BSW	CHA	CHL	GAS	GIR	GNS	HFD	HO2	HOL	JE2	JER	KUR	LAG	LMS	MAN	MAR	MON	ND1	ND2	ND3	NEL	NOR	NRC	OUL	PMT	PRP	RGU	RMG	SAL	SGT	SHK	SOM	TAR	VOS	ZBO	ZFU	ZMA
ABO	NA	NA	NA	NA	NA	NA	NA	NA	NA	NA	NA	NA	NA	NA	NA	NA	NA	NA	NA	NA	NA	NA	NA	NA	NA	NA	NA	NA	NA	NA	NA	NA	NA	NA	NA	NA	NA	NA	NA	NA	NA	NA	NA	NA	NA	NA	NA
ANG	0.1285	NA	NA	NA	NA	NA	NA	NA	NA	NA	NA	NA	NA	NA	NA	NA	NA	NA	NA	NA	NA	NA	NA	NA	NA	NA	NA	NA	NA	NA	NA	NA	NA	NA	NA	NA	NA	NA	NA	NA	NA	NA	NA	NA	NA	NA	NA
AUB	0.06411	0.1178	NA	NA	NA	NA	NA	NA	NA	NA	NA	NA	NA	NA	NA	NA	NA	NA	NA	NA	NA	NA	NA	NA	NA	NA	NA	NA	NA	NA	NA	NA	NA	NA	NA	NA	NA	NA	NA	NA	NA	NA	NA	NA	NA	NA	NA
BAO	0.2364	0.2685	0.2254	NA	NA	NA	NA	NA	NA	NA	NA	NA	NA	NA	NA	NA	NA	NA	NA	NA	NA	NA	NA	NA	NA	NA	NA	NA	NA	NA	NA	NA	NA	NA	NA	NA	NA	NA	NA	NA	NA	NA	NA	NA	NA	NA	NA
BLO	0.1228	0.1707	0.09065	0.2728	NA	NA	NA	NA	NA	NA	NA	NA	NA	NA	NA	NA	NA	NA	NA	NA	NA	NA	NA	NA	NA	NA	NA	NA	NA	NA	NA	NA	NA	NA	NA	NA	NA	NA	NA	NA	NA	NA	NA	NA	NA	NA	NA
BMA	0.1256	0.1281	0.1168	0.2346	0.166	NA	NA	NA	NA	NA	NA	NA	NA	NA	NA	NA	NA	NA	NA	NA	NA	NA	NA	NA	NA	NA	NA	NA	NA	NA	NA	NA	NA	NA	NA	NA	NA	NA	NA	NA	NA	NA	NA	NA	NA	NA	NA
BOR	0.1877	0.2184	0.1788	0.1189	0.226	0.1288	NA	NA	NA	NA	NA	NA	NA	NA	NA	NA	NA	NA	NA	NA	NA	NA	NA	NA	NA	NA	NA	NA	NA	NA	NA	NA	NA	NA	NA	NA	NA	NA	NA	NA	NA	NA	NA	NA	NA	NA	NA
BPN	0.08402	0.09964	0.06984	0.2331	0.1254	0.103	0.1804	NA	NA	NA	NA	NA	NA	NA	NA	NA	NA	NA	NA	NA	NA	NA	NA	NA	NA	NA	NA	NA	NA	NA	NA	NA	NA	NA	NA	NA	NA	NA	NA	NA	NA	NA	NA	NA	NA	NA	NA
BRM	0.3229	0.3361	0.3153	0.3805	0.3564	0.1901	0.1649	0.3155	NA	NA	NA	NA	NA	NA	NA	NA	NA	NA	NA	NA	NA	NA	NA	NA	NA	NA	NA	NA	NA	NA	NA	NA	NA	NA	NA	NA	NA	NA	NA	NA	NA	NA	NA	NA	NA	NA	NA
BRU	0.09761	0.1386	0.09026	0.2562	0.1456	0.1383	0.2024	0.09596	0.3404	NA	NA	NA	NA	NA	NA	NA	NA	NA	NA	NA	NA	NA	NA	NA	NA	NA	NA	NA	NA	NA	NA	NA	NA	NA	NA	NA	NA	NA	NA	NA	NA	NA	NA	NA	NA	NA	NA
BSW	0.1217	0.1614	0.115	0.2764	0.1697	0.1617	0.2245	0.1216	0.358	0.01209	NA	NA	NA	NA	NA	NA	NA	NA	NA	NA	NA	NA	NA	NA	NA	NA	NA	NA	NA	NA	NA	NA	NA	NA	NA	NA	NA	NA	NA	NA	NA	NA	NA	NA	NA	NA	NA
CHA	0.06487	0.09729	0.04649	0.2217	0.1043	0.09716	0.1727	0.05767	0.3071	0.08686	0.1112	NA	NA	NA	NA	NA	NA	NA	NA	NA	NA	NA	NA	NA	NA	NA	NA	NA	NA	NA	NA	NA	NA	NA	NA	NA	NA	NA	NA	NA	NA	NA	NA	NA	NA	NA	NA
CHL	0.06951	0.09536	0.05328	0.2165	0.1078	0.08983	0.165	0.06044	0.2879	0.09027	0.1138	0.02194	NA	NA	NA	NA	NA	NA	NA	NA	NA	NA	NA	NA	NA	NA	NA	NA	NA	NA	NA	NA	NA	NA	NA	NA	NA	NA	NA	NA	NA	NA	NA	NA	NA	NA	NA
GAS	0.06966	0.1182	0.04106	0.2218	0.09555	0.1153	0.1749	0.07069	0.3122	0.09302	0.1183	0.05114	0.05753	NA	NA	NA	NA	NA	NA	NA	NA	NA	NA	NA	NA	NA	NA	NA	NA	NA	NA	NA	NA	NA	NA	NA	NA	NA	NA	NA	NA	NA	NA	NA	NA	NA	NA
GIR	0.373	0.3838	0.3657	0.4276	0.4034	0.2343	0.2029	0.3684	0.05195	0.3929	0.4076	0.3591	0.3361	0.3626	NA	NA	NA	NA	NA	NA	NA	NA	NA	NA	NA	NA	NA	NA	NA	NA	NA	NA	NA	NA	NA	NA	NA	NA	NA	NA	NA	NA	NA	NA	NA	NA	NA
GNS	0.1317	0.1512	0.1196	0.2732	0.1723	0.1524	0.2219	0.1072	0.3537	0.1442	0.1681	0.1112	0.111	0.1195	0.405	NA	NA	NA	NA	NA	NA	NA	NA	NA	NA	NA	NA	NA	NA	NA	NA	NA	NA	NA	NA	NA	NA	NA	NA	NA	NA	NA	NA	NA	NA	NA	NA
HFD	0.1344	0.1369	0.1228	0.2783	0.1747	0.1032	0.2284	0.1101	0.3446	0.1467	0.1695	0.1096	0.1011	0.1228	0.3926	0.1572	NA	NA	NA	NA	NA	NA	NA	NA	NA	NA	NA	NA	NA	NA	NA	NA	NA	NA	NA	NA	NA	NA	NA	NA	NA	NA	NA	NA	NA	NA	NA
HO2	0.1216	0.1298	0.1135	0.2502	0.1628	0.1349	0.2044	0.09739	0.3212	0.134	0.1566	0.09657	0.09753	0.1128	0.366	0.1451	0.1446	NA	NA	NA	NA	NA	NA	NA	NA	NA	NA	NA	NA	NA	NA	NA	NA	NA	NA	NA	NA	NA	NA	NA	NA	NA	NA	NA	NA	NA	NA
HOL	0.1188	0.127	0.1101	0.2484	0.1597	0.1319	0.2019	0.09428	0.3199	0.1305	0.1533	0.09329	0.09449	0.1098	0.3652	0.1427	0.1413	0.004418	NA	NA	NA	NA	NA	NA	NA	NA	NA	NA	NA	NA	NA	NA	NA	NA	NA	NA	NA	NA	NA	NA	NA	NA	NA	NA	NA	NA	NA
JE2	0.1622	0.1823	0.1514	0.2999	0.2018	0.1842	0.2508	0.1413	0.3763	0.1761	0.1977	0.1441	0.1421	0.152	0.4233	0.1718	0.1894	0.1765	0.1745	NA	NA	NA	NA	NA	NA	NA	NA	NA	NA	NA	NA	NA	NA	NA	NA	NA	NA	NA	NA	NA	NA	NA	NA	NA	NA	NA	NA
JER	0.1341	0.1552	0.1232	0.2787	0.1772	0.1567	0.227	0.1116	0.3586	0.1491	0.1721	0.1161	0.1146	0.1242	0.4093	0.145	0.162	0.1517	0.1487	0.03277	NA	NA	NA	NA	NA	NA	NA	NA	NA	NA	NA	NA	NA	NA	NA	NA	NA	NA	NA	NA	NA	NA	NA	NA	NA	NA	NA
KUR	0.192	0.2221	0.1822	0.1442	0.23	0.1321	0.02585	0.185	0.1652	0.2062	0.228	0.1764	0.1689	0.179	0.2027	0.2257	0.2321	0.2088	0.2064	0.2557	0.2319	NA	NA	NA	NA	NA	NA	NA	NA	NA	NA	NA	NA	NA	NA	NA	NA	NA	NA	NA	NA	NA	NA	NA	NA	NA	NA
LAG	0.2809	0.3087	0.2687	0.1225	0.3146	0.2779	0.1711	0.2788	0.4261	0.2999	0.3175	0.2661	0.2586	0.2668	0.4733	0.3156	0.3188	0.2893	0.2875	0.341	0.3221	0.1924	NA	NA	NA	NA	NA	NA	NA	NA	NA	NA	NA	NA	NA	NA	NA	NA	NA	NA	NA	NA	NA	NA	NA	NA	NA
LMS	0.06384	0.1022	0.03534	0.2179	0.09064	0.1077	0.1717	0.06338	0.3038	0.08734	0.1113	0.04356	0.04972	0.04403	0.3519	0.1127	0.1146	0.105	0.1021	0.1442	0.1171	0.1757	0.2601	NA	NA	NA	NA	NA	NA	NA	NA	NA	NA	NA	NA	NA	NA	NA	NA	NA	NA	NA	NA	NA	NA	NA	NA
MAN	0.1116	0.09695	0.1003	0.2544	0.1526	0.109	0.2054	0.07782	0.3308	0.1237	0.1468	0.06485	0.06899	0.101	0.3813	0.1408	0.1285	0.1143	0.1104	0.1713	0.144	0.2093	0.2972	0.08962	NA	NA	NA	NA	NA	NA	NA	NA	NA	NA	NA	NA	NA	NA	NA	NA	NA	NA	NA	NA	NA	NA	NA
MAR	0.06981	0.1006	0.04952	0.2201	0.1083	0.1016	0.1699	0.05387	0.3064	0.0861	0.111	0.04824	0.05242	0.05468	0.3591	0.1034	0.1084	0.0976	0.09477	0.1358	0.1071	0.1739	0.2644	0.04811	0.08446	NA	NA	NA	NA	NA	NA	NA	NA	NA	NA	NA	NA	NA	NA	NA	NA	NA	NA	NA	NA	NA	NA
MON	0.07791	0.1431	0.08175	0.2481	0.1388	0.1415	0.2014	0.09874	0.329	0.1134	0.1374	0.08218	0.08614	0.0868	0.3754	0.144	0.1498	0.1342	0.1313	0.1749	0.1491	0.2052	0.2877	0.08203	0.1267	0.08648	NA	NA	NA	NA	NA	NA	NA	NA	NA	NA	NA	NA	NA	NA	NA	NA	NA	NA	NA	NA	NA
ND1	0.2043	0.2344	0.1916	0.06252	0.2452	0.1916	0.08398	0.1975	0.3408	0.2229	0.2461	0.1865	0.1822	0.1879	0.3967	0.241	0.2431	0.2189	0.2167	0.2715	0.2465	0.1027	0.1305	0.184	0.2208	0.1847	0.2182	NA	NA	NA	NA	NA	NA	NA	NA	NA	NA	NA	NA	NA	NA	NA	NA	NA	NA	NA	NA
ND2	0.2349	0.2629	0.2232	0.1119	0.2736	0.2167	0.1143	0.2284	0.3521	0.2539	0.2754	0.2186	0.2121	0.2195	0.4056	0.2704	0.2724	0.2455	0.2439	0.2982	0.2758	0.1329	0.1799	0.2137	0.2504	0.2165	0.2464	0.08326	NA	NA	NA	NA	NA	NA	NA	NA	NA	NA	NA	NA	NA	NA	NA	NA	NA	NA	NA
ND3	0.2375	0.269	0.2256	0.08653	0.2737	0.237	0.1295	0.2341	0.3889	0.2574	0.2777	0.2223	0.2172	0.2227	0.4377	0.2738	0.2794	0.251	0.2491	0.3009	0.2797	0.1481	0.1475	0.2179	0.2549	0.22	0.2491	0.02961	0.09907	NA	NA	NA	NA	NA	NA	NA	NA	NA	NA	NA	NA	NA	NA	NA	NA	NA	NA
NEL	0.3709	0.3812	0.3633	0.4274	0.4018	0.2357	0.2038	0.3658	0.06757	0.3911	0.4064	0.3564	0.3336	0.3603	0.0791	0.4033	0.39	0.363	0.3622	0.4222	0.4077	0.2042	0.4742	0.3493	0.379	0.3562	0.3735	0.3969	0.4066	0.4379	NA	NA	NA	NA	NA	NA	NA	NA	NA	NA	NA	NA	NA	NA	NA	NA	NA
NOR	0.1093	0.1268	0.09791	0.248	0.148	0.1308	0.2012	0.08626	0.3249	0.1229	0.1464	0.08494	0.08709	0.09799	0.3717	0.1346	0.1373	0.1172	0.1139	0.1646	0.138	0.2055	0.2873	0.09069	0.1069	0.08209	0.1228	0.2169	0.2444	0.2482	0.3695	NA	NA	NA	NA	NA	NA	NA	NA	NA	NA	NA	NA	NA	NA	NA	NA
NRC	0.1033	0.09963	0.09439	0.2455	0.1484	0.1113	0.1941	0.07426	0.3197	0.1165	0.1395	0.07305	0.07418	0.09405	0.3704	0.1276	0.1216	0.09464	0.09138	0.1619	0.1334	0.199	0.2879	0.08574	0.07728	0.07735	0.1188	0.2096	0.2402	0.2449	0.3676	0.09963	NA	NA	NA	NA	NA	NA	NA	NA	NA	NA	NA	NA	NA	NA	NA
OUL	0.1253	0.1626	0.1101	0.1788	0.1629	0.1478	0.1524	0.1191	0.3226	0.1435	0.1658	0.1088	0.1103	0.1111	0.3704	0.1644	0.1712	0.1529	0.1503	0.1929	0.1674	0.1583	0.2227	0.1029	0.1471	0.1069	0.1418	0.1514	0.1867	0.1793	0.3686	0.1426	0.1389	NA	NA	NA	NA	NA	NA	NA	NA	NA	NA	NA	NA	NA	NA
PMT	0.05833	0.09945	0.04688	0.2039	0.1032	0.0978	0.1568	0.04991	0.2914	0.07461	0.09909	0.04525	0.04878	0.04823	0.3404	0.09679	0.1072	0.09326	0.09052	0.1292	0.1015	0.1615	0.2472	0.04501	0.08279	0.03952	0.07373	0.1711	0.2013	0.205	0.3378	0.07815	0.0743	0.09624	NA	NA	NA	NA	NA	NA	NA	NA	NA	NA	NA	NA	NA
PRP	0.08332	0.0903	0.07315	0.224	0.1254	0.09711	0.1747	0.05582	0.302	0.09393	0.1182	0.05559	0.0578	0.07143	0.3517	0.1069	0.1041	0.05845	0.05481	0.1411	0.1134	0.1784	0.2659	0.06532	0.0742	0.05545	0.0959	0.1891	0.2183	0.2245	0.3491	0.07823	0.0576	0.1165	0.05266	NA	NA	NA	NA	NA	NA	NA	NA	NA	NA	NA	NA
RGU	0.1298	0.02885	0.1188	0.279	0.1743	0.1269	0.2224	0.09931	0.3517	0.1403	0.1648	0.09706	0.09393	0.1197	0.4057	0.1534	0.1333	0.1305	0.1272	0.1857	0.1563	0.2265	0.324	0.1042	0.09635	0.1015	0.1444	0.2414	0.2732	0.279	0.4037	0.1275	0.0995	0.1656	0.0993	0.09017	NA	NA	NA	NA	NA	NA	NA	NA	NA	NA	NA
RMG	0.1178	0.1496	0.1091	0.2361	0.1598	0.1303	0.1738	0.1056	0.3004	0.1288	0.1521	0.1018	0.1027	0.1066	0.3488	0.1506	0.157	0.1412	0.1391	0.1824	0.1559	0.1777	0.28	0.1022	0.1339	0.09628	0.1343	0.2014	0.231	0.2361	0.3469	0.1314	0.124	0.1407	0.08314	0.1027	0.1513	NA	NA	NA	NA	NA	NA	NA	NA	NA	NA
SAL	0.08454	0.1392	0.047	0.2459	0.1132	0.1361	0.1986	0.09349	0.3339	0.1149	0.139	0.06667	0.07313	0.06363	0.3842	0.1431	0.1432	0.1338	0.1302	0.1741	0.1471	0.2025	0.2894	0.05671	0.1202	0.07339	0.1026	0.2136	0.2446	0.2475	0.3816	0.1195	0.1142	0.1322	0.07115	0.09385	0.1406	0.1307	NA	NA	NA	NA	NA	NA	NA	NA	NA
SGT	0.1268	0.1218	0.118	0.2357	0.1681	0.0591	0.1278	0.1004	0.1911	0.1393	0.1627	0.09186	0.0884	0.1163	0.2379	0.154	0.1397	0.1326	0.1289	0.1859	0.1596	0.1316	0.2804	0.1083	0.08498	0.1026	0.1421	0.1919	0.2163	0.2376	0.2375	0.1301	0.1035	0.1476	0.09905	0.09532	0.1221	0.1309	0.1375	NA	NA	NA	NA	NA	NA	NA	NA
SHK	0.2157	0.2405	0.2067	0.2102	0.2543	0.1359	0.04786	0.2074	0.1336	0.2301	0.2526	0.1994	0.1894	0.2028	0.1703	0.2499	0.2497	0.2275	0.2256	0.2799	0.2561	0.05087	0.2616	0.1986	0.2307	0.1974	0.2279	0.1629	0.1889	0.216	0.1732	0.2268	0.2187	0.1935	0.1841	0.1994	0.2467	0.1986	0.2271	0.1352	NA	NA	NA	NA	NA	NA	NA
SOM	0.2154	0.2486	0.2042	0.0375	0.2523	0.2114	0.08955	0.2113	0.3505	0.2335	0.2541	0.2005	0.1961	0.2008	0.3966	0.2512	0.2587	0.2317	0.2297	0.2789	0.2567	0.1148	0.0988	0.1977	0.2344	0.1983	0.228	0.04356	0.09293	0.06637	0.3958	0.2288	0.2248	0.1572	0.1831	0.2034	0.2559	0.2138	0.2243	0.212	0.1798	NA	NA	NA	NA	NA	NA
TAR	0.06517	0.1278	0.0631	0.2416	0.126	0.1256	0.1901	0.08128	0.3286	0.09852	0.1236	0.06612	0.07074	0.0698	0.381	0.1301	0.1336	0.1218	0.119	0.1617	0.134	0.1933	0.2873	0.06495	0.1113	0.0685	0.08385	0.2075	0.2383	0.2425	0.3793	0.1068	0.1024	0.1248	0.05535	0.08187	0.1291	0.1163	0.08619	0.1272	0.2181	0.2194	NA	NA	NA	NA	NA
VOS	0.0563	0.1134	0.05385	0.2266	0.1115	0.1118	0.1757	0.06719	0.3123	0.08572	0.1109	0.05361	0.05786	0.05852	0.3649	0.1157	0.1221	0.1049	0.1018	0.1486	0.1203	0.18	0.2708	0.05382	0.09599	0.05644	0.07144	0.1923	0.2242	0.2276	0.362	0.09452	0.0865	0.1134	0.04621	0.06431	0.1136	0.1052	0.07564	0.1128	0.203	0.2048	0.05806	NA	NA	NA	NA
ZBO	0.2286	0.2534	0.2202	0.2286	0.2667	0.1366	0.0389	0.2207	0.09736	0.2442	0.2659	0.2127	0.2009	0.2162	0.1271	0.2617	0.2625	0.2393	0.2372	0.2906	0.2674	0.04203	0.2793	0.2118	0.2436	0.2105	0.2405	0.1794	0.2009	0.2348	0.1322	0.2393	0.2313	0.209	0.1975	0.2123	0.2603	0.2091	0.2401	0.1353	0.04021	0.1973	0.2309	0.2164	NA	NA	NA
ZFU	0.2364	0.2618	0.2286	0.2287	0.2727	0.1467	0.04306	0.2295	0.1095	0.2519	0.2729	0.2219	0.2096	0.2245	0.138	0.2696	0.2717	0.2479	0.2457	0.2965	0.2746	0.05199	0.2776	0.2198	0.2519	0.2195	0.248	0.1816	0.2026	0.235	0.1423	0.247	0.2405	0.2154	0.2064	0.2218	0.2692	0.2171	0.2478	0.1452	0.04893	0.1989	0.2397	0.2252	0.01036	NA	NA
ZMA	0.3079	0.327	0.3006	0.3291	0.3415	0.2083	0.1413	0.3027	0.1542	0.325	0.3434	0.2941	0.2778	0.2976	0.1827	0.3406	0.3373	0.311	0.3097	0.3646	0.3465	0.1425	0.3745	0.2897	0.3199	0.2922	0.3143	0.2903	0.307	0.3368	0.1905	0.3117	0.3095	0.2945	0.2767	0.2907	0.3409	0.2877	0.3189	0.2077	0.1134	0.2994	0.3129	0.2983	0.1035	0.1135	NA
