# Supplementary material for: Insights into the Genetic History of French Cattle from Dense SNP Data on 47 Worldwide Breeds
Source: PLoS One. 2010 Sep 30;5(9):e13038. doi: 10.1371/journal.pone.0013038 (PMC2948016; doi:10.1371/journal.pone.0013038)
Supplement: Table S5 — Comparison of PCA and sPCA. For each analysis, eigenvalues, percentage of genetic variance explained and Moran's I spatial autocorrelation associated to the corresponding principal components are given. (0.01 MB XLS) [file pone.0013038.s011.xls]

## Sheet: TableS5
Axis	Spatial PCA				PCA
	Eigenvalue	Variance % (*)	Cumulated Variance %	Moran's I	Eigenvalue	Variance %	Cumulated Variance %	Moran's I
1	1122.9	12.1321	12.1321	0.87318	1346.3	12.7009	12.7	0.7636
2	494.9	7.36887	19.5009	0.63351	1045.3	9.86132	22.56	0.1379
3	470.3	5.55094	25.0519	0.79928	955.3	9.01226	31.57	0.06183
4	342.0	7.27642	32.3283	0.44342	786.8	7.42264	39	-0.4877
5	164.6	3.17453	35.5028	0.48931	712.1	6.71792	45.72	0.3327
6	131.6	3.31698	38.8198	0.3743	632.1	5.96321	51.68	-0.0855
7	93.4	2.63868	41.4585	0.33397	603.0	5.68868	57.37	-0.03788
8	70.4	2.48208	43.9406	0.26753	579.7	5.46887	62.84	-0.0007272
9	16.0	3.09623	47.0368	0.04881	499.1	4.70849	67.55	-0.2744
10	-26.2	2.99151	50.0283	-0.08249	467.9	4.41415	71.96	-0.1763
11	-57.0	3.40849	53.4368	-0.15774	361.6	3.41132	75.37	-0.01225
12	-72.7	3.90755	57.3443	-0.17544	338.6	3.19434	78.57	0.04861
13	-82.3	2.59811	59.9425	-0.29883	296.1	2.7934	81.36	0.04822
14	-91.0	2.60094	62.5434	-0.32994	254.9	2.40472	83.76	-0.2586
15	-106.1	3.29811	65.8415	-0.30336	253.3	2.38962	86.15	6.894e-05
16	-137.1	3.2283	69.0698	-0.40063	230.9	2.1783	88.33	-0.3495
17	-201.0	3.53302	72.6028	-0.53689	223.0	2.10377	90.43	-0.1351
18	-217.0	3.89528	76.4981	-0.52556	221.5	2.08962	92.52	-0.137
19	-224.0	3.50943	80.0075	-0.60208	214.3	2.0217	94.55	-0.1066
20	-297.2	6.02453	86.0321	-0.46543	203.0	1.91509	96.46	-0.08382
21	-356.3	6.81038	92.8425	-0.49352	197.9	1.86698	98.33	-0.003968
22	-515.4	7.1566	99.9991	-0.67947	177.2	1.6717	100	-0.2435
(*)	Variance of the scores (projection of the coordinates) on the corresponding axis
